# Supplementary material for: Tularemia in Pregnant Woman, Serbia, 2018
Source: PubMed Central journal article supplement (PMC10045689; doi:10.3201/eid2904.221318), 2023-04
Supplement: 22-1318-Techapp-s1.pdf [file 22-1318-Techapp-s1.pdf]

Article DOI: <https://doi.org/10.3201/eid2904.221318>

*EID cannot ensure accessibility for supplementary materials supplied by authors. Readers who have difficulty accessing supplementary content should contact the authors for assistance.*

# Tularemia in Pregnant Woman, Serbia, 2018

## Appendix

In the available literature, tularemia in pregnancy is very rare; 12 cases have been described in the literature: 2 in the United States (1–3), 2 in France (4–6), and 8 in Turkey (4,6,7). Including the case reported here, all pregnant women who accepted treatment (gentamicin, azithromycin, and amoxicillin/clavulanic acid) and 2 who refused treatment gave birth to a healthy child with no complications; 2 who refused treatment had a spontaneous abortion and 1 had a premature birth. Analyzing cases of tularemia in pregnancy, the outcome of pregnancy without complications and the birth of a healthy child was more common in patients for whom tularemia was diagnosed in the second and third trimesters (3–9).

## References

1. Centers for Disease Control and Prevention. Key facts about tularemia [2023 Mar 10]]. <https://emergency.cdc.gov/agent/tularemia/facts.asp>
2. Djordjevic Spasic M. Immunodiagnostic and molecular methods in evaluation of the therapy efficiency on patients suffering from tularemia [PhD thesis]. Nis, Serbia: University of Nis; 2014.
3. Bricker D. Tularemia infection during pregnancy. *Am J Nurs*. 1931;31:979–82.
4. Charles P, Stumpf P, Buffet P, Hot A, Lecuit M, Dupont B, et al. Two unusual glandular presentations of tick-borne tularemia. *Med Mal Infect*. 2008;38:159–61. [PubMed](#)  
<https://doi.org/10.1016/j.medmal.2007.11.005>
5. Dentan C, Pavese P, Pelloux I, Boisset S, Brion JP, Stahl JP, et al. Treatment of tularemia in pregnant woman, France. *Emerg Infect Dis*. 2013;19:996–8. [PubMed](#)  
<https://doi.org/10.3201/eid1906.130138>

6. Ata N, Kılıç S, Övet G, Alataş N, Çelebi B. Tularemia during pregnancy. *Infection*. 2013;41:753–6. [PubMed https://doi.org/10.1007/s15010-013-0456-5](https://doi.org/10.1007/s15010-013-0456-5)
7. Yeşilyurt M, Kiliç S, Çelebi B, Gül S. Tularemia during pregnancy: report of four cases. *Scand J Infect Dis*. 2013;45:324–8. [PubMed https://doi.org/10.3109/00365548.2012.720027](https://doi.org/10.3109/00365548.2012.720027)
8. Dudley PB, Don CW. Tularemia and pregnancy: report of a case. *J Am Med Assoc*. 1936;107:577–8. <https://doi.org/10.1001/jama.1936.92770340001007>
9. Yilmaz GR, Guven T, Guner R, Kilic S, Gulen TA, Eser FC, et al. Tularemia during pregnancy: three cases. *Vector Borne Zoonotic Dis*. 2014;14:171–3. [PubMed https://doi.org/10.1089/vbz.2013.1406](https://doi.org/10.1089/vbz.2013.1406)
